# Supplementary material
Source: ML conference proceedings conference paper supplement (https://openreview.net/forum?id=t0LkF9JnVb)
Supplement: supplementary_material [file attachment]

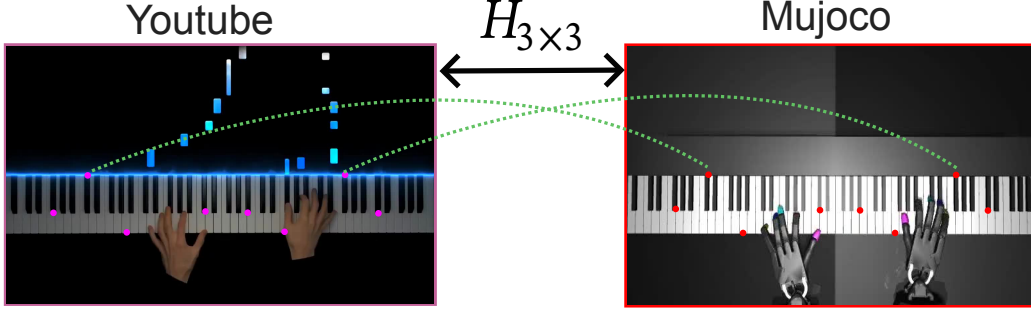

Figure 6: Compute homography matrix given 8 correspondence feature points.

## A Retargeting: From human hand to robot hand

To retarget from the human hand to robot hand, we follow a structured process.

**Step 1: Homography Matrix Computation** Given a top-view piano demonstration video, we firstly choose  $n$  different feature points on the piano. These points could be center points of specific keys, edges, or other identifiable parts of the keys that are easily recognizable (See Figure 6). Due to the uniform design of pianos, these points represent the same physical positions in both the video and Mujoco. Given the chosen points, we follow the Eight-point Algorithm to compute the Homography Matrix  $H$  that transforms the pixel coordinate in videos to the x-y coordinate in Mujoco (z-axis is the vertical axis).

**Step 2: Transformation of Fingertip Trajectory** We then obtain the human fingertip trajectory with MediaPipe [20]. We collect the fingertips positions every 0.05 seconds. Then we transform the human fingertip trajectory within pixel coordinate into the Mujoco x-y 2D coordinate using the computed homography matrix  $H$ .

**Step 3: Heuristic Adjustment for Physical Alignment** We found that the transformed fingertip trajectory might not physically align with the notes, which means there might be no detected fingertip that physically locates at the keys to be pressed or the detected fingertip might locate at the border of the key (normally human presses the middle point of the horizontal axis of the key). This misalignment could be due to the inaccuracy of the hand-tracking algorithm and the homography matrix. Therefore, we perform a simple heuristic adjustment on the trajectory to improve the physical alignment. Specifically, at each timestep of the video, we check whether there is any fingertip that physically locates at the key to be pressed. If there is, we adjust its y-axis value to the middle point of the corresponding key. Otherwise, we search within a small range, specifically the neighboring two keys, to find the nearest fingertip. If no fingertip is found in the range or the found fingertip has been assigned to another key to be pressed, we then leave it. Otherwise, we adjust its y-axis value to the center of the corresponding key to ensure proper physical alignment.

**Step 4: Z-axis Value Assignment** Lastly, we assign the z-axis value for the fingertips. For the fingertips that press keys, we set their z-axis values to 0. For other fingertips, we set their z-axis value to  $2 \cdot h_{key}$ , where  $h_{key}$  is the height of the keys in Mujoco.

## B Implementation of Inverse Kinematics Solver

The implementation of the IK solver is based on the approach of [21]. The solver addresses multiple tasks simultaneously by formulating an optimization problem and find the optimal joint velocities that minimize the objective function. The optimization problem is given by:

$$\min_{\dot{q}} \sum_i w_i \|J_i \dot{q} - K_i v_i\|^2, \quad (1)$$

where  $w_i$  is the weight of each task,  $K_i$  is the proportional gain and  $v_i$  is the velocity residual. We define a set of 10 tasks, each specifying the desired position of one of the robot fingertips. We do not specify the desired quaternions. All the weights  $w_i$  are set to be equal. We use quadprog<sup>2</sup> to solve the optimization problem with quadratic programming. The other parameters are listed in Table 2.

Table 2: The parameters of IK solver

| Parameter                   | Value |
|-----------------------------|-------|
| Gain                        | 1.0   |
| Limit Gain                  | 0.05  |
| Damping                     | 1e-6  |
| Levenberg-Marquardt Damping | 1e-6  |

## C Detailed MDP Formulation of Song-specific Policy

Table 3: The detailed reward function to train the song-specific policy. The Key Press reward is the same as in [11], where  $k_s$  and  $k_g$  represent the current and the goal states of the key respectively, and  $g$  is a function that transforms the distances to rewards in the  $[0, 1]$  range.  $p_{df}$  and  $p_{rf}$  represent the fingertip positions of human demonstrator and robot respectively.

| Reward    | Formula                                                                             | Weight | Explanation                                   |
|-----------|-------------------------------------------------------------------------------------|--------|-----------------------------------------------|
| Key Press | $0.5 \cdot g(\ k_s - k_g\ _2) + 0.5 \cdot (1 - \mathbf{1}_{\text{false positive}})$ | 2/3    | Press the right keys and only the right keys  |
| Mimic     | $g(\ p_{df} - p_{rf}\ _2)$                                                          | 1/3    | Mimic the demonstrator’s fingertip trajectory |

Table 4: The observation space of song-specific agent.

| Observation                                             | Unit     | Size |
|---------------------------------------------------------|----------|------|
| Hand and Forearm Joint Positions                        | Rad      | 52   |
| Hand and forearm Joint Velocities                       | Rad/s    | 52   |
| Piano Key Joint Positions                               | Rad      | 88   |
| Piano key Goal State                                    | Discrete | 88   |
| Demonstrator Forearm and Fingertips Cartesian Positions | m        | 36   |
| Prior control input $\tilde{u}$ (solved by IK)          | Rad      | 52   |
| Sustain Pedal state                                     | Discrete | 1    |

## D Training Details of Song-specific Policy

We use PPO [27] (implemented by StableBaseline 3 [30]) to train the song-specific policy with residual RL (See Algorithm 1). All of the experiments are conducted using the same network architecture and tested using 3 different seeds. Both actor and critic networks are of the same architecture, containing 2 MLP hidden layers with 1024 and 256 nodes, respectively, and GELU [31] as activation functions. The detailed hyperparameters of the networks are listed in Table 7.

<sup>2</sup><https://github.com/quadprog/quadprog>

Table 5: The action space of song-specific agent.

| Action                 | Unit     | Size |
|------------------------|----------|------|
| Target Joint Positions | Rad      | 46   |
| Sustain Pedal          | Discrete | 1    |

Table 6: The Hyperparameters of PPO

| Hyperparameter                 | Value             |
|--------------------------------|-------------------|
| Initial Learning Rate          | 3e-4              |
| Learning Rate Scheduler        | Exponential Decay |
| Decay Rate                     | 0.999             |
| Actor Hidden Units             | 1024, 256         |
| Actor Activation               | GELU              |
| Critic Hidden Units            | 1024, 256         |
| Critic Activation              | GELU              |
| Discount Factor                | 0.99              |
| Steps per Update               | 8192              |
| GAE Lambda                     | 0.95              |
| Entropy Coefficient            | 0.0               |
| Maximum Gradient Norm          | 0.5               |
| Batch Size                     | 1024              |
| Number of Epochs per Iteration | 10                |
| Clip Range                     | 0.2               |
| Number of Iterations           | 2000              |
| Optimizer                      | Adam              |

## E Representation Learning of Goal

We train an autoencoder to learn a geometrically continuous representation of the goal (See Figure 7 and Algorithm 2). During the training phase, the encoder  $\mathcal{E}$ , encodes the original 88-dimensional binary representation of a goal piano state  $\mathcal{J}_t$  into a 16-dimensional latent code  $z$ . The positional encoding of a randomly sampled 3D query coordinate  $x$  is then concatenated with the latent code  $z$  and passed through the decoder  $\mathcal{D}$ . We use positional encoding here to represent the query coordinate more expressively. The decoder is trained to predict the SDF  $f(x, \mathcal{J}_t)$ . We define the SDF value of  $x$  with respect to  $\mathcal{J}_t$  as the Euclidean distance between the  $x$  and the nearest key that is supposed to be pressed in  $\mathcal{J}_t$ , mathematically expressed as:

$$\text{SDF}(x, \mathcal{J}_t) = \min_{p \in \{p_i | \mathcal{J}_{t,i}=1\}} \|x - p\|, \quad (2)$$

where  $p_i$  represents the position of the  $i$ -th key on the piano. The encoder and decoder are jointly optimized to minimize the reconstruction loss:

$$L(x, \mathcal{J}_t) = (\text{SDF}(x, \mathcal{J}_t) - \mathcal{D}(\mathcal{E}(v, x)))^2. \quad (3)$$

We pre-train the autoencoder using the **GiantMIDI** dataset<sup>3</sup>, which contains 10K piano MIDI files of 2,786 composers. The pre-trained encoder maps the  $\mathcal{J}_t$  into the 16-dimensional latent code, which serves as the latent goal for behavioral cloning. The encoder network is composed of four

<sup>3</sup><https://github.com/bytedance/GiantMIDI-Piano>

---

**Algorithm 1** Training of the song-specific policy with residual RL

---

```

1: Initialize actor network  $\pi_\theta$ 
2: Initialize critic network  $v_\phi$ 
3: for  $i = 1 : N_{iteration}$  do
4:   # Collect trajectories
5:   for  $t = 1 : T$  do
6:     Get human demonstrator fingertip position  $x_t$  and observation  $o_t$ 
7:     Compute the prior control signal that tracks  $x_t$  with the IK controller  $\tilde{u}_t = ik(x_t, o_t)$ 
8:     Run policy to get the residual term  $r_t = \pi_\theta(o_t)$ 
9:     Compute the adapted control signal  $u_t = \tilde{u}_t + r_t$ 
10:    Execute  $u_t$  in environment and collect  $s_t, u_t, r_t, s_{t+1}$ 
11:   end for
12:   # Update networks
13:   for  $n = 1 : N$  do
14:     Sample a batch of transitions  $\{(s_j, u_j, r_j, s_{j+1})\}$  from the collected trajectories
15:     Update the actor and critic network with PPO
16:   end for
17: end for

```

---

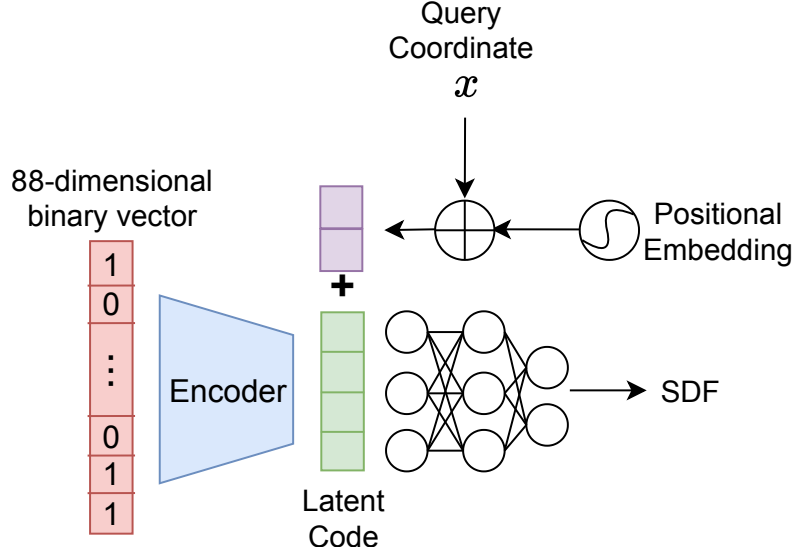

Figure 7: 1) Encoding: The encoder compresses the binary representation of the goal into latent code. 2) Decoding: A 3D query coordinate  $x$  is randomly sampled. A neural network predicts the SDF value given the positional encoding of  $x$  and the latent code.

468 1D-convolutional layers, followed by a linear layer. Each successive 1D-convolutional layer has an  
469 increasing number of filters, specifically 2, 4, 8, and 16 filters, respectively. All convolutional layers  
470 utilize a kernel size of 3. The linear layer transforms the flattened output from the convolutional  
471 layers into a 16-dimensional latent code. The decoder network is a MLP with 2 hidden layers, each  
472 with 16 neurons. We train the autoencoder for 100 epochs with a learning rate of  $1e - 3$ .

## 473 F Training Details of Diffusion Model

474 All the diffusion models utilized in this work, including One-stage Diff, the high-level and  
475 low-level policies of Two-stage Diff, Two-stage Diff-res and Two-stage Diff w/o SDF, share  
476 the same network architecture. The network architecture are the same as the U-net diffusion

---

**Algorithm 2** Training of the goal autoencoder

---

```
1: Initialize encoder  $\mathcal{E}_\phi$ 
2: Initialize decoder  $\mathcal{D}_\psi$ 
3: for  $i = 1 : N_{epoch}$  do
4:   for  $j = 1 : N_{batch}$  do
5:     for each goal  $v$  in batch do
6:       Compute the latent code  $\mathbf{z} = \mathcal{E}_\psi(\mathcal{J}_t)$ 
7:       Sample a 3D coordinate as query  $\mathbf{x} = \text{Sample3DCoordinate}()$ 
8:       Compute the positional encoding of query  $\mathbf{pe} = \text{PositionalEncoding}(x)$ 
9:       Compute the output of the decoder conditioned by the query  $\mathcal{D}_\phi(\mathbf{z}, \mathbf{pe})$ 
10:      Compute the SDF value of query  $\text{SDF}(x, \mathcal{J}_t)$ 
11:      Compute the reconstruction loss  $L$ 
12:    end for
13:    Compute the sum of the loss
14:    Compute the gradient
15:    Update network parameter  $\phi, \psi$ 
16:  end for
17: end for
```

---

477 policy in [22] and optimized with DDPM [28], except that we use temporal convolutional net-  
478 works (TCNs) as the observation encoder, taking the concatenated goals (high-level policy) or  
479 fingertip positions (low-level policy) of several timesteps as input to extract the features on tem-  
480 poral dimension. Each level of U-net is then conditioned by the outputs of TCNs through FiLM [32].

481  
482 High-level policies take the binary representation (Two-stage Diff w/o SDF) or the SDF em-  
483 bedding (Two-stage Diff, Two-stage Diff-res) of goals over 10 timesteps and the current fingertip  
484 position as input and predict the fingertip positions of 4 timesteps. Besides, for training the  
485 high-level policies, we add a standard gaussian noise on the current fingertip position to enhance  
486 generalization. Low-level policies take the predicted fingertip positions and the goals over 4  
487 timesteps, the proprioception state and the action solved by IK solver (only for Two-stage Diff-res)  
488 as input and output the robot actions (One-stage Diff, Two-stage Diff, Two-stage Diff w/o SDF)  
489 or the residual term of IK solver (Two-stage Diff-res). The proprioception state includes the robot  
490 joint positions and velocities, as well as the piano joint positions. We use 100 diffusion steps during  
491 training. To achieve high-quality results during inference, we find that at least 80 diffusion steps are  
492 required for high-level policies and 50 steps for low-level policies.

Table 7: The Hyperparameters of DDPM

| Hyperparameter                    | Value          |
|-----------------------------------|----------------|
| Initial Learning Rate             | 1e-4           |
| Learning Rate Scheduler           | Cosine         |
| U-Net Filters Number              | 256, 512, 1024 |
| U-Net Kernel Size                 | 5              |
| TCN Filters Number                | 32, 64         |
| TCN Kernel Size                   | 3              |
| Diffusion Steps Number            | 100            |
| Batch Size                        | 256            |
| Number of Iterations              | 800            |
| Optimizer                         | AdamW          |
| EMA Exponential Factor            | 0.75           |
| EMA Inverse Multiplicative Factor | 1              |

## G Policy Distillation Experiment

**Two-stage Diff w/o SDF** We directly use the binary representation of goal instead of the SDF embedding representation to condition the high-level and low-level policies.

**Two-stage Diff-res** We employ an IK solver to compute the target joints given the fingertip positions predicted by the high-level policy. The low-level policy predicts the residual terms of IK solver instead of the robot actions.

**Two-stage BeT** We train both high-level and low-level policies with Behavior Transformer [23] instead of DDPM. The hyperparameter of BeT is listed in Table 8.

**One-stage Diff** We train a single diffusion model to predict the robot actions given the SDF embedding representation of goals and the proprioception state.

**Multi-task RL** We create a multi-task environment where for each episode a random song is sampled from the dataset. Consequently, we use Soft-Actor-Critic (SAC) [33] to train a single agent within the environment. Both the actor and critic networks are MLPs, each with 3 hidden layers, and each hidden layer contains 256 neurons. The reward function is the same as that in [11].

**BC-MSE** We train a feedforward network to predict the robot action of next timestep conditioned on the binary representation of goal and proprioception state with MSE loss. The feedforward network is a MLP with 3 hidden layers, each with 1024 neurons.

Table 8: The Hyperparameters of Behavior Transformer

| Hyperparameter                    | Value  |
|-----------------------------------|--------|
| Initial Learning Rate             | 3e-4   |
| Learning Rate Scheduler           | Cosine |
| Number of Discretization Bins     | 64     |
| Number of Transformer Heads       | 8      |
| Number of Transformer Layers      | 8      |
| Embedding Dimension               | 120    |
| Batch Size                        | 256    |
| Number of Iterations              | 1200   |
| Optimizer                         | AdamW  |
| EMA Exponential Factor            | 0.75   |
| EMA Inverse Multiplicative Factor | 1      |

## H F1 Score of All Trained Song-Specific Policies

Figure 8 shows the F1 score of all song-specific policies we trained.

## I Detailed Results on Test Dataset

**Note:** We observed that the F1 scores reported for all methods in the main part of the paper were higher than their actual values (Precision and Recall are correct). This error is due to an issue with scikit<sup>4</sup>. Here, we present the corrected F1 scores of our two methods. We will update the F1 scores

<sup>4</sup><https://github.com/scikit-learn/scikit-learn/pull/27577>

of other baselines during the rebuttal phase. We apologize for the inconvenience. In Table 9 and Table 10, we show the Precision, Recall and F1 score of each song in our collected test dataset and the Etude-12 dataset from [11], achieved by Two-stage Diff and Two-stage Diff-res, respectively. We observe an obvious performance degradation when testing on Etude-12 dataset. We suspect that the reason is due to out-of-distribution data, as the songs in the Etude-12 dataset are all classical, whereas our training and test dataset primarily consists of modern songs.

Table 9: Quantitative results of each song in the our collected test dataset

| Song Name              | Two-stage Diff |             |             | Two-stage Diff-res |             |             |
|------------------------|----------------|-------------|-------------|--------------------|-------------|-------------|
|                        | Precision      | Recall      | F1          | Precision          | Recall      | F1          |
| Forester               | 0.81           | 0.70        | 0.68        | 0.79               | 0.71        | 0.67        |
| Wednesday              | 0.66           | 0.57        | 0.58        | 0.67               | 0.54        | 0.55        |
| Alone                  | 0.80           | 0.62        | 0.66        | 0.83               | 0.65        | 0.67        |
| Somewhere Only We Know | 0.63           | 0.53        | 0.58        | 0.67               | 0.57        | 0.59        |
| Eyes Closed            | 0.60           | 0.52        | 0.53        | 0.61               | 0.45        | 0.50        |
| Pedro                  | 0.70           | 0.58        | 0.60        | 0.67               | 0.56        | 0.47        |
| Ohne Dich              | 0.73           | 0.55        | 0.58        | 0.75               | 0.56        | 0.62        |
| Paradise               | 0.66           | 0.42        | 0.43        | 0.68               | 0.45        | 0.47        |
| Hope                   | 0.74           | 0.55        | 0.57        | 0.76               | 0.58        | 0.62        |
| No Time To Die         | 0.77           | 0.53        | 0.55        | 0.79               | 0.57        | 0.60        |
| The Spectre            | 0.64           | 0.52        | 0.54        | 0.67               | 0.50        | 0.52        |
| Numb                   | 0.55           | 0.44        | 0.45        | 0.57               | 0.47        | 0.48        |
| <b>Mean</b>            | <b>0.69</b>    | <b>0.54</b> | <b>0.56</b> | <b>0.71</b>        | <b>0.55</b> | <b>0.57</b> |

Table 10: Quantitative results of each song in the Etude-12 dataset

| Song Name                     | Two-stage Diff |             |             | Two-stage Diff-res |             |             |
|-------------------------------|----------------|-------------|-------------|--------------------|-------------|-------------|
|                               | Precision      | Recall      | F1          | Precision          | Recall      | F1          |
| FrenchSuiteNo1Allemande       | 0.45           | 0.31        | 0.34        | 0.39               | 0.27        | 0.30        |
| FrenchSuiteNo5Sarabande       | 0.29           | 0.23        | 0.24        | 0.24               | 0.18        | 0.19        |
| PianoSonataD8451StMov         | 0.58           | 0.52        | 0.52        | 0.60               | 0.50        | 0.51        |
| PartitaNo26                   | 0.35           | 0.22        | 0.24        | 0.40               | 0.24        | 0.26        |
| WaltzOp64No1                  | 0.44           | 0.31        | 0.33        | 0.43               | 0.28        | 0.31        |
| BagatelleOp3No4               | 0.45           | 0.30        | 0.33        | 0.45               | 0.28        | 0.32        |
| KreislerianaOp16No8           | 0.43           | 0.34        | 0.36        | 0.49               | 0.34        | 0.36        |
| FrenchSuiteNo5Gavotte         | 0.34           | 0.29        | 0.33        | 0.41               | 0.31        | 0.33        |
| PianoSonataNo232NdMov         | 0.35           | 0.24        | 0.25        | 0.29               | 0.19        | 0.21        |
| GolliwoggsCakewalk            | 0.60           | 0.43        | 0.45        | 0.57               | 0.40        | 0.42        |
| PianoSonataNo21StMov          | 0.32           | 0.22        | 0.25        | 0.36               | 0.23        | 0.25        |
| PianoSonataK279InCMajor1StMov | 0.43           | 0.35        | 0.35        | 0.53               | 0.38        | 0.39        |
| <b>Mean</b>                   | <b>0.42</b>    | <b>0.31</b> | <b>0.33</b> | <b>0.43</b>        | <b>0.30</b> | <b>0.32</b> |

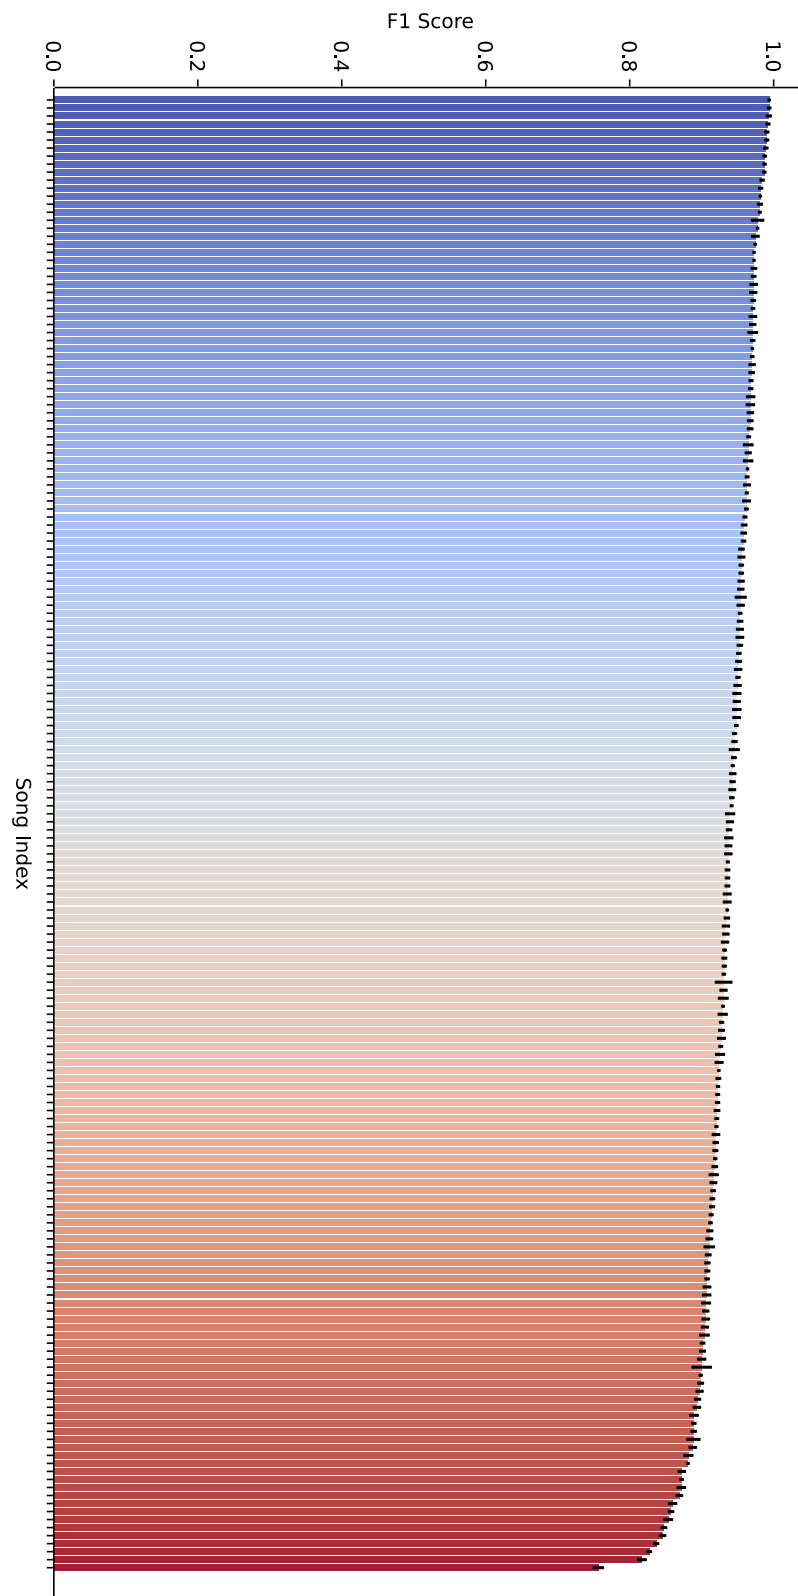

Figure 8: F1 score of all 184 trained song-specific policies (descending order)
